# Supplementary material for: Lipidomic Analyses Reveal Specific Alterations of Phosphatidylcholine in Dystrophic Mdx Muscle
Source: PubMed Central journal article supplement (PMC8791236; doi:10.3389/fphys.2021.698166), 2022-01-12
Supplement: Image_3.pdf [file Image_3.pdf]

# Supplementary Figure 3

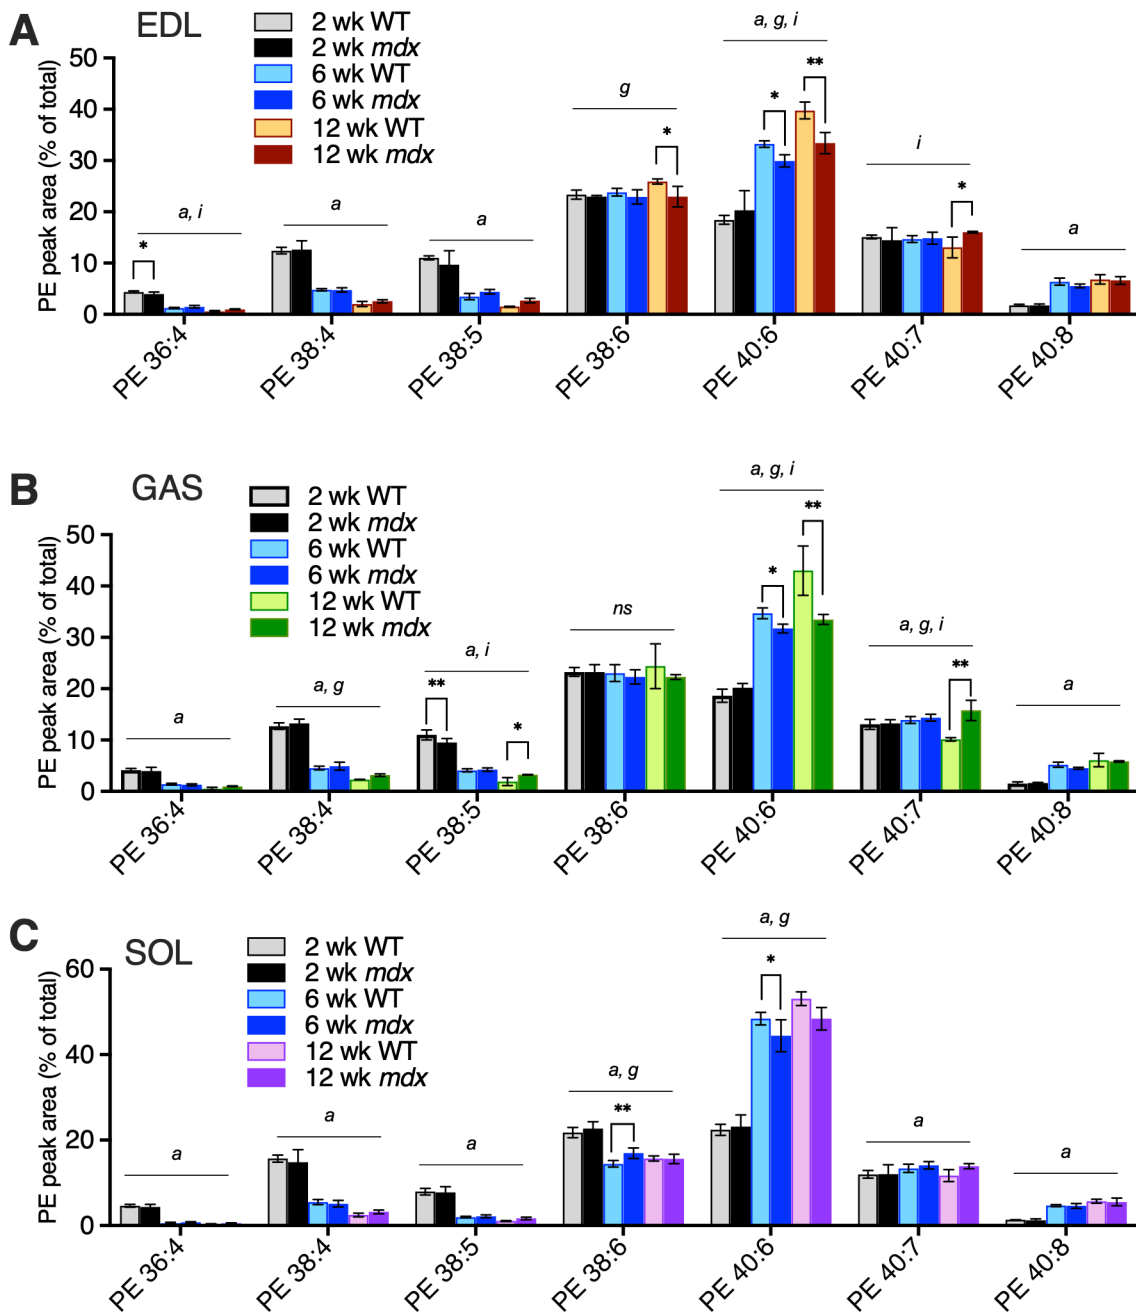

**Supplementary Figure 3.** PE alterations in EDL, GAS and SOL of B10-WT and *-mdx* mice of various ages (2-, 6-, and 12-week-old) raised on CE-2 standard chow. PE was measured in EDL (A), GAS (B), and SOL (C). PE peak values are expressed as the percentage of total signals, and means  $\pm$  SD are plotted. Significant variation ( $p < 0.05$ ) was determined by two-way ANOVA and factor effects for each peak are shown for age (*a*), *mdx* genotype (*g*), and interactive effects (*i*). Significant pair-wise differences between same-aged WT and *mdx* muscles were determined by Sidak's post tests; \* $p < 0.05$ , \*\* $p < 0.01$ .  $n=3-6$  mice/group. *ns*; non-significant.
