# Supplementary material for: Lipidomic Analyses Reveal Specific Alterations of Phosphatidylcholine in Dystrophic Mdx Muscle
Source: PubMed Central journal article supplement (PMC8791236; doi:10.3389/fphys.2021.698166), 2022-01-12
Supplement: Image_4.pdf [file Image_4.pdf]

## Supplementary Figure 4

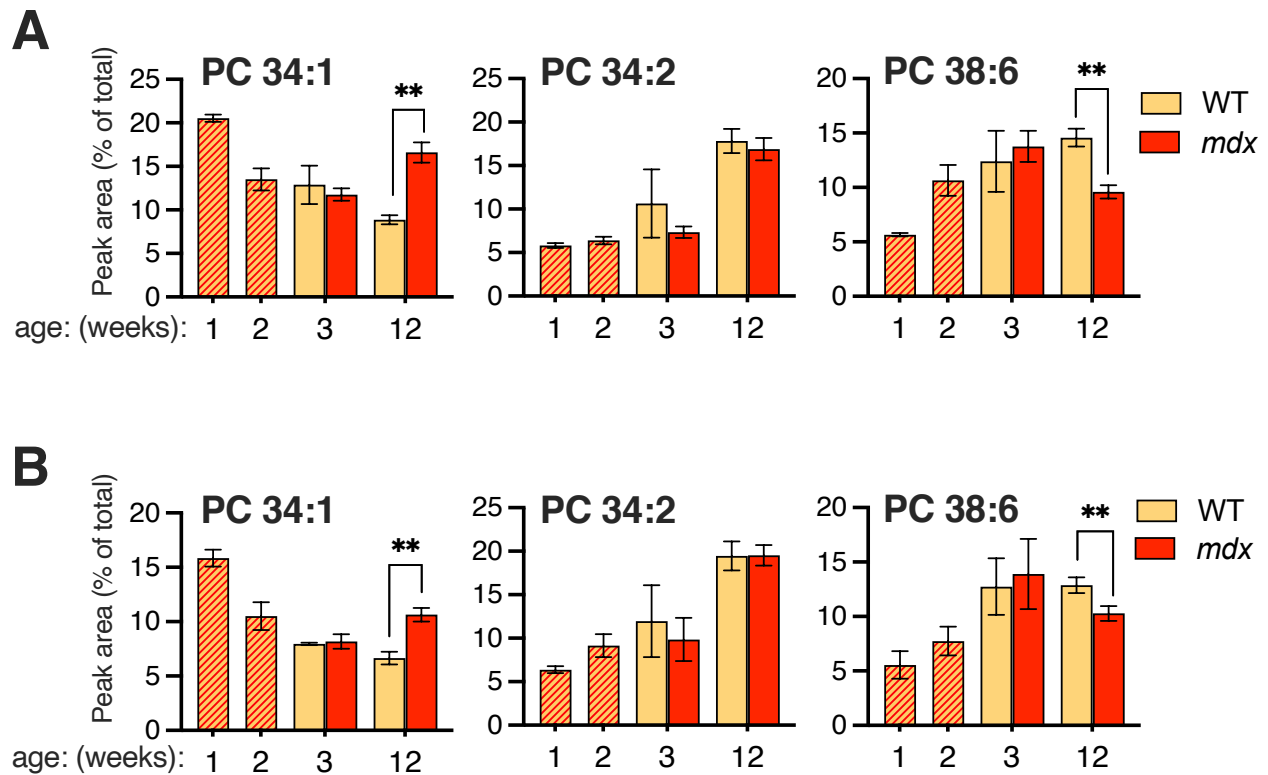

**Supplementary Figure 4.** Time course of PC 34:1, PC 34:2, and PC 38:6 alterations in EDL muscles of 1- to 12-week-old B10-WT and -*mdx* mice fed custom diets. Mice were raised on custom diets rich in FA 18:1/oleic acid (oleic) (**A**) or FA 18:2 /linoleic acid (linoleic) (**B**). Similar patterns of alterations were seen in both custom diets, with the *mdx*-associated alterations of high PC 34:1 and low PC 38:6 evident at age 12-weeks, but alterations of PC 34:2 were not detected. PC peak values are expressed as the percentage of total PC signals, and means  $\pm$  SD are plotted. 1- and 2-week-old groups (hatched bars) contain both WT and *mdx*, male and female, pups, and are shown for reference. Includes identical data (12-week time point) shown in Figure 6. Significance is based on unpaired t-tests. \* $p < 0.05$ , \*\* $p < 0.01$ ;  $n=3-8$  mice/group.
